# Supplementary material
Source: PubMed Central journal article supplement (PMC4056920)
Supplement: ml300107e_si_001.pdf [file ml300107e_si_001.pdf]

**Supporting Information:****Truncated Nucleosides as A<sub>3</sub> Adenosine Receptor Ligands:  
Combination of 2-Arylethynyl and Bicyclohexane Substitutions**

Dilip K. Tosh, Silvia Paoletta, Khai Phan, Zhan-Guo Gao, and Kenneth A. Jacobson

| <b>Contents:</b>                                                                                                             | <b>page</b> |
|------------------------------------------------------------------------------------------------------------------------------|-------------|
| <b>Chemical synthetic procedures</b> for truncated nucleosides <b>4 – 21</b><br>and protected intermediates <b>25 – 30</b> . | S2-S9       |
| <b>Spectroscopic characterization of selected nucleoside derivatives.</b>                                                    | S10-S15     |
| <b>Pharmacological assay procedures.</b>                                                                                     | S16-S18     |
| <b>Molecular modeling and general SAR requirements</b> for<br>truncated series compared to 5'-N-methyluronamides.            | S20-S23     |

Abbreviations: ADA, adenosine deaminase; AR, adenosine receptor; cyclic AMP, adenosine 3',5'-cyclic phosphate; CHO, Chinese hamster ovary; Cl-IB-MECA, 2-chloro-*N*<sup>6</sup>-(3-iodobenzyl)-5'-*N*-methylcarboxamidoadenosine; DMEM, Dulbecco's modified Eagle's medium; EDTA, ethylenediaminetetraacetic acid; GPCR, G protein-coupled receptor; HEK, human embryonic kidney; I-AB-MECA, 2-[*p*-(2-carboxyethyl)phenyl-ethylamino]-5'-*N*-ethylcarboxamidoadenosine; NECA, 5'-*N*-ethylcarboxamidoadenosine; DMF, *N,N*-dimethylformamide; HEPES, 4-(2-hydroxyethyl)-1-piperazineethanesulfonic acid; HRMS, high resolution mass spectroscopy; TEA, triethylamine; TLC, thin layer chromatography.

## Chemical synthesis

### Chemistry

#### General Methods

All reagents and solvents (regular and anhydrous) were of analytical grade and obtained from commercial suppliers and used without further purification. The substituted phenyl alkynes to produce protected nucleoside intermediates **31-48** were obtained from Sigma-Aldrich (St. Louis, MO). Reactions were conducted under an atmosphere of nitrogen whenever anhydrous solvents were used. All reactions were monitored by thin-layer chromatography (TLC) using silica gel coated plates with a fluorescence indicator which were visualized: (a) under UV light, (b) by dipping in a mixture of anisaldehyde (2.5 mL)/ conc. H<sub>2</sub>SO<sub>4</sub> (5 mL)/methanol (425 mL) or (c) by dipping the plate in a solution of ninhydrin (0.3 g in 100 mL EtOH, containing AcOH, 1.3 mL) followed by heating. Silica gel column chromatography was performed with silica gel (SiO<sub>2</sub>, 200-400 mesh, 60 Å) using moderate air pressure. Evaporation of solvents was carried out under reduced pressure at a temperature below 50 °C. After column chromatography, appropriate fractions were pooled, evaporated, and dried at high vacuum for at least 12 h to give the desired products in high purity. <sup>1</sup>H NMR spectra were recorded with a Bruker 400 MHz NMR spectrometer. Chemical shifts are reported in parts per million (ppm) relative to tetramethylsilane or using deuterated solvent as the internal standard (δH: CDCl<sub>3</sub> 7.26 ppm). ESI - High Resolution Mass Spectroscopic (HRMS) measurements were performed on a proteomics optimized Q-TOF-2 (Micromass-Waters) using external calibration with polyalanine. Observed mass accuracies are those expected on the basis of known performance of the instrument as well as the trends in masses of standard compounds observed at intervals during the series of measurements. Reported masses are observed masses uncorrected for this time-dependent drift in mass accuracy. The purity of the final nucleoside derivatives was determined using a Hewlett-Packard 1100 HPLC equipped with a Zorbax Eclipse 5 mm XDB-C18 analytical column (250 X 4.6 mm; Agilent Technologies Inc, Palo Alto, CA), using a linear gradient solvent system: 5 mM TBAP (tetrabutylammonium dihydrogenphosphate)-CH<sub>3</sub>CN from 80:20 to 40:60 in 20 min with a flow rate of 1 mL/min. Peaks were detected by UV absorption (254 nm) using a diode array detector.

All derivatives tested for biological activity were shown to be at least 95% pure using this analytical HPLC system. Compounds **23** and **24** were prepared as reported.<sup>1,2</sup>

**(1*R*,2*R*,3*S*,4*R*,5*S*)-4-(6-(Methylamino)-2-(phenylethynyl)-9*H*-purin-9-yl)  
bicyclo[3.1.0]hexane-2,3-diol (4)**

PdCl<sub>2</sub>(PPh<sub>3</sub>)<sub>2</sub> (4.0 mg, 0.005 mmol), CuI (1.0 mg, 0.003 mmol), phenylacetylene (19 μL, 0.17 mmol) and triethylamine (40 μL, 0.28 mmol) were added to a solution of compound **25** (12.35 mg, 0.028 mmol) in anhydrous DMF (0.8 mL), and the mixture was stirred at room temperature overnight. Solvent was evaporated under vacuum, and the residue was purified roughly on flash silica gel column chromatography, to yield intermediate **31**. The resulting compound was dissolved in methanol (1.5 mL)-dichloromethane (0.5 mL), 50% trifluoromethane sulfonic acid (2 mL) was added to the reaction mixture, and it was stirred at room temperature overnight. Solvent was evaporated under vacuum, and the residue was purified on flash silica gel column chromatography (CH<sub>2</sub>Cl<sub>2</sub>:MeOH = 35:1) to give compound **4** (8 mg, 77%) as a syrup. <sup>1</sup>H NMR (CD<sub>3</sub>OD, 400 MHz) δ 8.23 (s, 1H), 7.67-7.65 (m, 2H), 7.47-7.43 (m, 3H), 4.88 (s, 1H), 4.70 (t, *J* = 6.0 Hz, 1H), 3.91 (d, *J* = 6.8 Hz, 1H), 3.17 (br s, 3H), 2.04-1.99 (m, 1H), 1.75-1.70 (m, 1H), 1.40-1.36 (m, 1H), 0.82-0.76 (m, 1H). HRMS calculated for C<sub>20</sub>H<sub>20</sub>N<sub>5</sub>O<sub>2</sub> (M + H)<sup>+</sup>: 362.1617; found 362.1613.

**(1*R*,2*R*,3*S*,4*R*,5*S*)-4-(2-((2-Chloro-phenyl)ethynyl)-6-(methylamino)-9*H*-purin-9-yl)  
bicyclo[3.1.0]hexane-2,3-diol (5)**

Compound **5** (74%) was prepared from compound **25** following the same method for compound **4**. <sup>1</sup>H NMR (CD<sub>3</sub>OD, 400 MHz) δ 8.23 (s, 1H), 7.72 (dd, *J*<sub>1</sub> = 1.6 Hz, *J*<sub>2</sub> = 6.0 Hz, 1H), 7.55-7.53 (m, 1H), 7.46-7.36 (m, 2H), 4.96 (s, 1H), 4.73 (t, *J* = 6.0 Hz, 1H), 3.91 (d, *J* = 6.4 Hz, 1H), 3.17 (br s, 3H), 2.04-1.99 (m, 1H), 1.74-1.69 (m, 1H), 1.38-1.35 (m, 1H), 0.81-0.76 (m, 1H). HRMS calculated for C<sub>20</sub>H<sub>19</sub>ClN<sub>5</sub>O<sub>2</sub> (M + H)<sup>+</sup>: 396.1227; found 396.1222.

**(1*R*,2*R*,3*S*,4*R*,5*S*)-4-(6-(Methoxyamino)-2-(phenylethynyl)-9*H*-purin-9-yl)  
bicyclo[3.1.0]hexane-2,3-diol (6)**

Compound **6** (54%) was prepared from compound **26** following the same method for compound **4**. <sup>1</sup>H NMR (CD<sub>3</sub>OD, 400 MHz) δ 8.31 (s, 1H), 7.67-7.66 (m, 2H), 7.47-7.45 (m, 3H), 4.72 (t, *J* = 5.6 Hz, 1H), 3.90 (m, 4H), 2.07-1.98 (m, 1H), 1.78-1.69 (m, 1H),

1.41-1.36 (m, 1H), 0.80-0.77 (m, 1H). HRMS calculated for  $C_{20}H_{20}N_5O_3$  (M + H)<sup>+</sup>: 378.1566; found 378.1578.

**(1*R*,2*R*,3*S*,4*R*,5*S*)-4-(2-((2-Chloro-phenyl)ethynyl)-6-(methoxyamino)-9*H*-purin-9-yl) bicyclo[3.1.0]hexane-2,3-diol (7)**

Compound **7** (63%) was prepared from compound **26** following the same method for compound **4**. <sup>1</sup>H NMR (CD<sub>3</sub>OD, 400 MHz) δ 8.32 (s, 1H), 7.75 (d, *J* = 7.6 Hz, 1H), 7.54 (d, *J* = 8.0 Hz, 1H), 7.50-7.37 (m, 2H), 4.75 (t, *J* = 6.4 Hz, 1H), 3.94 (d, *J* = 6.0 Hz, 1H), 3.91 (s, 3H), 2.08-1.97 (m, 1H), 1.76-1.68 (m, 1H), 1.38-1.34 (m, 1H), 0.82-0.76 (m, 1H). HRMS calculated for  $C_{20}H_{19}ClN_5O_3$  (M + H)<sup>+</sup>: 412.1176; found 412.1166.

**(1*R*,2*R*,3*S*,4*R*,5*S*)-4-(6-(Ethylamino)-2-(phenylethynyl)-9*H*-purin-9-yl) bicyclo[3.1.0]hexane-2,3-diol (8)**

Compound **8** (63%) was prepared from compound **27** following the same method for compound **4**. <sup>1</sup>H NMR (CD<sub>3</sub>OD, 400 MHz) δ 8.23 (s, 1H), 7.67-7.64 (m, 2H), 7.46-7.44 (m, 3H), 4.70 (t, *J* = 5.6 Hz, 1H), 4.59 (br s, 2H), 3.91 (d, *J* = 6.4 Hz, 1H), 2.04-1.99 (m, 1H), 1.75-1.71 (m, 1H), 1.39-1.31 (m, 4H), 0.82-0.77 (m, 1H). HRMS calculated for  $C_{21}H_{22}N_5O_2$  (M + H)<sup>+</sup>: 376.1774; found 376.1794.

**(1*R*,2*R*,3*S*,4*R*,5*S*)-4-(2-((2-Chloro-phenyl)ethynyl)-6-(ethylamino)-9*H*-purin-9-yl) bicyclo[3.1.0]hexane-2,3-diol (9)**

Compound **9** (67%) was prepared from compound **27** following the same method for compound **4**. <sup>1</sup>H NMR (CD<sub>3</sub>OD, 400 MHz) δ 8.23 (s, 1H), 7.72 (d, *J* = 7.6 Hz, 1H), 7.53 (d, *J* = 7.6 Hz, 1H), 7.45-7.36 (m, 2H), 4.90 (s, 1H), 4.73 (t, *J* = 5.6 Hz, 1H), 4.58 (br s, 2H), 3.91 (d, *J* = 6.4 Hz, 1H), 2.04-1.99 (m, 1H), 1.74-1.69 (m, 1H), 1.38-1.31 (m, 4H), 0.81-0.76 (m, 1H). HRMS calculated for  $C_{21}H_{21}ClN_5O_2$  (M + H)<sup>+</sup>: 410.1384; found 410.1383.

**(1*R*,2*R*,3*S*,4*R*,5*S*)-4-(6-(3-Chloro-benzylamino)-2-(phenylethynyl)-9*H*-purin-9-yl) bicyclo[3.1.0]hexane-2,3-diol (10)**

Compound **10** (72%) was prepared from compound **28** following the same method for compound **4**. <sup>1</sup>H NMR (CD<sub>3</sub>OD, 400 MHz) δ 8.25 (s, 1H), 7.65-7.63 (m, 2H), 7.47-7.43 (m, 4H), 7.38-7.26 (m, 3H), 4.72 (t, *J* = 5.6 Hz, 1H), 3.92 (d, *J* = 6.4 Hz, 1H), 2.05-2.00 (m, 1H), 1.78-1.69 (m, 1H), 1.42-1.36 (m, 1H), 0.81-0.76 (m, 1H). HRMS calculated for  $C_{26}H_{23}ClN_5O_2$  (M + H)<sup>+</sup>: 472.1540; found 472.1540.

**(1*R*,2*R*,3*S*,4*R*,5*S*)-4-(6-(3-Chloro-benzylamino)-2-((3,4-difluorophenyl)ethynyl)-9*H*-purin-9-yl)bicyclo[3.1.0]hexane-2,3-diol (11)**

Compound **11** (71%) was prepared from compound **28** following the same method for compound **4**. <sup>1</sup>H NMR (CD<sub>3</sub>OD, 400 MHz) δ 8.26 (s, 1H), 7.60-7.55 (m, 1H), 7.50-7.45 (m, 2H), 7.39-7.28 (m, 4H), 4.92 (s, 1H), 4.71 (t, *J* = 5.6 Hz, 1H), 3.93 (d, *J* = 6.8 Hz, 1H), 2.04-1.98 (m, 1H), 1.74-1.70 (m, 1H), 1.38-1.35 (m, 1H), 0.82-0.76 (m, 1H). HRMS calculated for C<sub>26</sub>H<sub>21</sub>ClF<sub>2</sub>N<sub>5</sub>O<sub>2</sub> (M + H)<sup>+</sup>: 508.1352; found 508.1347.

**(1*R*,2*R*,3*S*,4*R*,5*S*)-4-(6-(3-Chloro-benzylamino)-2-((2-chlorophenyl)ethynyl)-9*H*-purin-9-yl)bicyclo[3.1.0]hexane-2,3-diol (12)**

Compound **12** (82%) was prepared from compound **28** following the same method for compound **4**. <sup>1</sup>H NMR (CD<sub>3</sub>OD, 400 MHz) δ 8.25 (s, 1H), 7.72-7.63 (m, 1H), 7.58-7.49 (m, 1H), 7.43-7.26 (m, 6H), 4.73 (t, *J* = 5.6 Hz, 1H), 3.93 (d, *J* = 6.8 Hz, 1H), 2.01-1.97 (m, 1H), 1.71-1.69 (m, 1H), 1.36-1.34 (m, 1H), 0.84-0.75 (m, 1H). HRMS calculated for C<sub>26</sub>H<sub>22</sub>Cl<sub>2</sub>N<sub>5</sub>O<sub>2</sub> (M + H)<sup>+</sup>: 506.1151; found 506.1142.

**(1*R*,2*R*,3*S*,4*R*,5*S*)-4-(6-(3-Chloro-benzylamino)-2-((3-chlorophenyl)ethynyl)-9*H*-purin-9-yl)bicyclo[3.1.0]hexane-2,3-diol (13)**

Compound **13** (75%) was prepared from compound **28** following the same method for compound **4**. <sup>1</sup>H NMR (CD<sub>3</sub>OD, 400 MHz) δ 8.26 (s, 1H), 7.68-7.61 (m, 1H), 7.59-7.51 (m, 1H), 7.49-7.41 (m, 3H), 7.38-7.31 (m, 3H), 4.92 (s, 1H), 4.71 (t, *J* = 5.2 Hz, 1H), 3.93 (d, *J* = 6.4 Hz, 1H), 2.04-1.98 (m, 1H), 1.75-1.71 (m, 1H), 1.39-1.36 (m, 1H), 0.82-0.78 (m, 1H). HRMS calculated for C<sub>26</sub>H<sub>22</sub>Cl<sub>2</sub>N<sub>5</sub>O<sub>2</sub> (M + H)<sup>+</sup>: 506.1151; found 506.1131.

**(1*R*,2*R*,3*S*,4*R*,5*S*)-4-(2-(Biphenyl-4-ylethynyl)-6-(3-chlorobenzylamino)-9*H*-purin-9-yl)bicyclo[3.1.0]hexane-2,3-diol (14)**

Compound **14** (70%) was prepared from compound **28** following the same method for compound **4**. <sup>1</sup>H NMR (CD<sub>3</sub>OD, 400 MHz) δ 8.26 (s, 1H), 7.78-7.65 (m, 6H), 7.52-7.44 (m, 3H), 7.43-7.25 (m, 4H), 4.72 (t, *J* = 5.6 Hz, 1H), 3.93 (d, *J* = 6.8 Hz, 1H), 2.06-1.97 (m, 1H), 1.78-1.69 (m, 1H), 1.43-1.37 (m, 1H), 0.85-0.76 (m, 1H). HRMS calculated for C<sub>32</sub>H<sub>27</sub>ClN<sub>5</sub>O<sub>2</sub> (M + H)<sup>+</sup>: 548.1853; found 548.1849.

**(1*R*,2*R*,3*S*,4*R*,5*S*)-4-(6-(Phenethylamino)-2-(phenylethynyl)-9*H*-purin-9-yl) bicycle [3.1.0]hexane-2,3-diol (15)**

Compound **15** (69%) was prepared from compound **29** following the same method for compound **4**.  $^1\text{H}$  NMR ( $\text{CD}_3\text{OD}$ , 400 MHz)  $\delta$  8.22 (s, 1H), 7.67-7.65 (m, 2H), 7.45-7.44 (m, 3H), 7.33-7.27 (m, 4H), 7.21-7.18 (m, 1H), 4.69 (t,  $J = 5.6$  Hz, 1H), 4.59 (br s, 2H), 3.90 (d,  $J = 6.4$  Hz, 1H), 3.03 (t,  $J = 7.2$  Hz, 2H), 2.03-1.99 (m, 1H), 1.74-1.71 (m, 1H), 1.39-1.36 (m, 1H), 0.82-0.76 (m, 1H). HRMS calculated for  $\text{C}_{27}\text{H}_{26}\text{N}_5\text{O}_2$  ( $\text{M} + \text{H}$ ) $^+$ : 452.2087; found 452.2070.

**(1*R*,2*R*,3*S*,4*R*,5*S*)-4-(2-((2-Chlorophenyl)ethynyl)-6-(phenethylamino)-9*H*-purin-9-yl)bicyclo[3.1.0]hexane-2,3-diol (16)**

Compound **16** (83%) was prepared from compound **29** following the same method for compound **4**.  $^1\text{H}$  NMR ( $\text{CD}_3\text{OD}$ , 400 MHz)  $\delta$  8.24 (s, 1H), 7.73(d,  $J = 6.4$  Hz, 1H), 7.56-7.54 (m, 1H), 7.46-7.31 (m, 6H), 7.29-7.19 (m, 1H), 4.72 (t,  $J = 5.6$  Hz, 1H), 4.59 (br s, 2H), 3.90 (d,  $J = 6.4$  Hz, 1H), 3.03 (t,  $J = 7.2$  Hz, 2H), 2.04-1.99 (m, 1H), 1.76-1.68 (m, 1H), 1.40-1.32 (m, 1H), 0.85-0.76 (m, 1H). HRMS calculated for  $\text{C}_{27}\text{H}_{25}\text{ClN}_5\text{O}_2$  ( $\text{M} + \text{H}$ ) $^+$ : 486.1697; found 486.1712.

**(1*R*,2*R*,3*S*,4*R*,5*S*)-4-(6-(2,2-diphenylethylamino)-2-(phenylethynyl)-9*H*-purin-9-yl)bicyclo[3.1.0]hexane-2,3-diol (17)**

Compound **17** (82%) was prepared from compound **30** following the same method for compound **4**.  $^1\text{H}$  NMR ( $\text{CD}_3\text{OD}$ , 400 MHz)  $\delta$  8.18 (s, 1H), 7.68-7.65 (m, 2H), 7.46-7.43 (m, 3H), 7.42-7.34 (m, 4H), 7.32-7.28 (m, 4H), 7.22-7.18 (m, 2H), 4.93 (s, 1H), 4.67 (t,  $J = 5.6$  Hz, 1H), 4.52 (t,  $J = 7.6$  Hz, 1H), 4.30 (br s, 2H), 3.89 (d,  $J = 6.4$  Hz, 1H), 2.02-1.96 (m, 1H), 1.71-1.69 (m, 1H), 1.38-1.35 (m, 1H), 0.80-0.75 (m, 1H). HRMS calculated for  $\text{C}_{33}\text{H}_{30}\text{N}_5\text{O}_2$  ( $\text{M} + \text{H}$ ) $^+$ : 528.2400; found 528.2395.

**(1*R*,2*R*,3*S*,4*R*,5*S*)-4-(2-((3,4-Difluorophenyl)ethynyl)-6-(2,2-diphenylethylamino)-9*H*-purin-9-yl)bicyclo[3.1.0]hexane-2,3-diol (18)**

Compound **18** (68%) was prepared from compound **30** following the same method for compound **4**.  $^1\text{H}$  NMR ( $\text{CD}_3\text{OD}$ , 400 MHz)  $\delta$  8.20 (s, 1H), 7.70-7.64 (m, 1H), 7.63-7.56 (m, 1H), 7.53-7.48 (m, 1H), 7.42-7.37 (m, 4H), 7.34-7.27 (m, 4H), 7.25-7.17 (m, 2H), 4.68 (t,  $J = 5.6$  Hz, 1H), 4.51 (t,  $J = 8.0$  Hz, 1H), 4.29 (br s, 2H), 3.90 (d,  $J = 6.4$  Hz, 1H), 2.04-1.96 (m, 1H), 1.75-1.67 (m, 1H), 1.41-1.34 (m, 1H), 0.84-0.74 (m, 1H). HRMS calculated for  $\text{C}_{33}\text{H}_{28}\text{F}_2\text{N}_5\text{O}_2$  ( $\text{M} + \text{H}$ ) $^+$ : 564.2211; found 564.2211.

**(1*R*,2*R*,3*S*,4*R*,5*S*)-4-(2-((2-Chlorophenyl)ethynyl)-6-(2,2-diphenylethylamino)-9*H*-purin-9-yl)bicyclo[3.1.0]hexane-2,3-diol (19)**

Compound **19** (79%) was prepared from compound **30** following the same method for compound **4**. <sup>1</sup>H NMR (CD<sub>3</sub>OD, 400 MHz) δ 8.19 (s, 1H), 7.68-7.63 (m, 2H), 7.59-7.54 (m, 2H), 7.42-7.78 (m, 4H), 7.35-7.28 (m, 4H), 7.24-7.18 (m, 2H), 4.93 (s, 1H), 4.70 (t, *J* = 5.6 Hz, 1H), 4.57 (t, *J* = 7.6 Hz, 1H), 4.29 (br s, 2H), 3.89 (d, *J* = 6.8 Hz, 1H), 2.02-1.96 (m, 1H), 1.70-1.68 (m, 1H), 1.37-1.34 (m, 1H), 0.80-0.74 (m, 1H). HRMS calculated for C<sub>33</sub>H<sub>29</sub>ClN<sub>5</sub>O<sub>2</sub> (M + H)<sup>+</sup>: 562.2010; found 562.2000.

**(1*R*,2*R*,3*S*,4*R*,5*S*)-4-(2-((3-Chlorophenyl)ethynyl)-6-(2,2-diphenylethylamino)-9*H*-purin-9-yl)bicyclo[3.1.0]hexane-2,3-diol (20)**

Compound **20** (87%) was prepared from compound **30** following the same method for compound **4**. <sup>1</sup>H NMR (CD<sub>3</sub>OD, 400 MHz) δ 8.19 (s, 1H), 7.72-7.76 (m, 1H), 7.63-7.56 (m, 1H), 7.52-7.43 (m, 2H), 7.41-7.36 (m, 4H), 7.33-7.28 (m, 4H), 7.24-7.17 (m, 2H), 4.68 (t, *J* = 5.6 Hz, 1H), 4.53 (t, *J* = 7.6 Hz, 1H), 4.30 (br s, 2H), 3.89 (d, *J* = 6.8 Hz, 1H), 2.03-1.97 (m, 1H), 1.73-1.67 (m, 1H), 1.39-1.34 (m, 1H), 0.82-0.72 (m, 1H). HRMS calculated for C<sub>33</sub>H<sub>29</sub>ClN<sub>5</sub>O<sub>2</sub> (M + H)<sup>+</sup>: 562.2010; found 562.2014.

**(1*R*,2*R*,3*S*,4*R*,5*S*)-4-(2-(Biphenyl-4-ylethynyl)-6-(2,2-diphenylethylamino)-9*H*-purin-9-yl)bicyclo[3.1.0]hexane-2,3-diol (21)**

Compound **21** (78%) was prepared from compound **30** following the same method for compound **4**. <sup>1</sup>H NMR (CD<sub>3</sub>OD, 400 MHz) δ 8.19 (s, 1H), 7.77-7.63 (m, 6H), 7.62-7.45 (m, 3H), 7.43-7.36 (m, 4H), 7.34-7.28 (m, 4H), 7.22-7.19 (m, 2H), 4.68 (t, *J* = 5.6 Hz, 1H), 4.52 (t, *J* = 7.6 Hz, 1H), 4.32 (br s, 2H), 3.90 (d, *J* = 6.4 Hz, 1H), 2.03-1.97 (m, 1H), 1.76-1.67 (m, 1H), 1.42-1.35 (m, 1H), 0.84-0.76 (m, 1H). HRMS calculated for C<sub>39</sub>H<sub>34</sub>N<sub>5</sub>O<sub>2</sub> (M + H)<sup>+</sup>: 604.2713; found 604.2714.

**(1*R*,2*R*,3*S*,4*R*,5*S*)-4-(2-Iodo-6-(methylamino)-9*H*-purin-9-yl)-2',3'-*O*-(isopropylidene)-bicyclo[3.1.0]hexane (25)**

Methylamine hydrochloride (49 mg, 0.72 mmol) and triethylamine (0.28 mL, 1.96 mmol) were added to a solution of compound **24** (62.8 mg, 0.14 mmol) in methanol (2.0 mL) and stirred at room temperature overnight. The reaction mixture was evaporated under vacuum, and the residue was purified on flash column chromatography (hexane:ethyl acetate = 1:1) to give the desired product **25** (51 mg, 83%) as a syrup. <sup>1</sup>H NMR (CD<sub>3</sub>OD,

400 MHz)  $\delta$  8.02 (s, 1H), 5.36 (t,  $J = 6.8$  Hz, 1H), 4.96 (s, 1H), 4.70 (d,  $J = 7.2$  Hz, 1H), 3.07 (br s, 3H), 2.07-2.01 (m, 1H), 1.72-1.67 (m, 1H), 1.52 (s, 3H), 1.26 (s, 3H), 0.96-0.92 (m, 2H). HRMS calculated for  $C_{15}H_{19}IN_5O_2$  (M + H)<sup>+</sup>: 428.0584; found 428.0600.

**(1*R*,2*R*,3*S*,4*R*,5*S*)-4-(2-Iodo-6-(methoxyamino)-9*H*-purin-9-yl)-2',3'-*O*-isopropylidene)-bicyclo[3.1.0]hexane (26)**

Compound **26** (65%) was prepared from compound **24** following the same method for compound **25**. <sup>1</sup>H NMR (CD<sub>3</sub>OD, 400 MHz)  $\delta$  8.13 (s, 1H), 5.38 (t,  $J = 6.8$  Hz, 1H), 4.98 (s, 1H), 4.73 (d,  $J = 6.8$  Hz, 1H), 3.87 (s, 3H), 2.08-2.04 (m, 1H), 1.73-1.69 (m, 1H), 1.52 (s, 3H), 1.26 (s, 3H), 0.94-0.89 (m, 2H). HRMS calculated for  $C_{15}H_{19}IN_5O_3$  (M + H)<sup>+</sup>: 444.0533; found 444.0526.

**(1*R*,2*R*,3*S*,4*R*,5*S*)-4-(2-Iodo-6-(ethylamino)-9*H*-purin-9-yl)-2',3'-*O*-(isopropylidene)-bicyclo[3.1.0] hexane (27)**

Compound **27** (78%) was prepared from compound **24** following the same method for compound **25**. <sup>1</sup>H NMR (CD<sub>3</sub>OD, 400 MHz)  $\delta$  8.03 (s, 1H), 5.36 (t,  $J = 6.8$  Hz, 1H), 4.96 (s, 1H), 4.70 (d,  $J = 7.2$  Hz, 1H), 4.6 (br s, 2H), 2.07-2.01 (m, 1H), 1.72-1.69 (m, 1H), 1.52 (s, 3H), 1.30-1.23 (m, 6H), 0.93-0.88 (m, 2H). HRMS calculated for  $C_{16}H_{21}IN_5O_2$  (M + H)<sup>+</sup>: 442.0740; found 442.0740.

**(1*R*,2*R*,3*S*,4*R*,5*S*)-4-(2-Iodo-6-(3-chloro-benzylamino)-9*H*-purin-9-yl)-2',3'-*O*-(isopropylidene)-bicyclo[3.1.0]hexane (28)**

Compound **28** (74%) was prepared from compound **24** following the same method for compound **25**. <sup>1</sup>H NMR (CDCl<sub>3</sub>, 300 MHz)  $\delta$  7.63 (s, 1H), 7.37 (s, 1H), 7.27-7.26 (m, 3H), 6.25 (br s, 1H), 5.34 (t,  $J = 5.7$  Hz, 1H), 4.94 (s, 2H), 4.64 (d,  $J = 6.9$  Hz, 1H), 2.06-2.09 (m, 1H), 1.61-1.69 (m, 2H), 1.54 (s, 3H), 1.26 (s, 3H), 0.88-0.96 (m, 2H). HRMS calculated for  $C_{21}H_{22}ClIN_5O_2$  (M+H)<sup>+</sup>: 538.0497; found 538.0507.

**(1*R*,2*R*,3*S*,4*R*,5*S*)-4-(2-Iodo-6-(2-phenylethylamino)-9*H*-purin-9-yl)-2',3'-*O*-(isopropylidene)-bicyclo[3.1.0]hexane (29)**

Compound **29** (84%) was prepared from compound **24** following the same method for compound **25**. <sup>1</sup>H NMR (CD<sub>3</sub>OD, 400 MHz)  $\delta$  8.02 (s, 1H), 7.28 (s, 4H), 7.19 (m, 1H), 5.36 (t,  $J = 6.4$  Hz, 1H), 4.95 (s, 1H), 4.69 (d,  $J = 6.4$  Hz, 1H), 3.78 (br s, 2H), 2.97 (t,  $J = 6.0$  Hz, 2H), 2.03-1.99 (m, 1H), 1.70-1.69 (m, 1H), 1.51 (s, 3H), 1.25 (s, 3H), 0.93-0.89 (m, 2H). HRMS calculated for  $C_{22}H_{25}IN_5O_2$  (M + H)<sup>+</sup>: 518.1053; found 518.1037.



**(1*R*,2*R*,3*S*,4*R*,5*S*)-4-(2-Iodo-6-(2,2-diphenylethylamino)-9*H*-purin-9-yl)-2',3'-*O*-  
(isopropylidene)-bicyclo[3.1.0]hexane (30)**

Compound **30** (79%) was prepared from compound **24** following the same method for compound **25**. <sup>1</sup>H NMR (CD<sub>3</sub>OD, 400 MHz) δ 8.01 (s, 1H), 7.36-7.28 (m, 9H), 7.21-7.17 (m, 1H) 5.34 (t, *J* = 6.4 Hz, 1H), 4.93 (s, 1H), 4.67 (d, *J* = 6.8 Hz, 1H), 4.49 (d, *J* = 7.6 Hz, 1H), 4.17 (d, *J* = 7.6 Hz, 2H), 2.05-1.99 (m, 1H), 1.69-1.65 (m, 1H), 1.51 (s, 3H), 1.24 (s, 3H), 0.93-0.86 (m, 2H). HRMS calculated for C<sub>28</sub>H<sub>29</sub>IN<sub>5</sub>O<sub>2</sub> (M + H)<sup>+</sup>: 594.1366; found 594.1382.

**References:**

1. Choi, W. J.; Park, J. G.; Yoo, S. J.; Kim, H. P.; Moon, H. R.; Chun, M. W.; Jung, Y. H.; Jeong, L. S. Syntheses of D- and L-cyclopentenone derivatives using ring-closing metathesis: versatile intermediates for the synthesis of D- and L-carbocyclic nucleosides. *J. Org. Chem.* **2001**, *66*, 6490–6494.
2. Joshi, B.V.; Melman, A.; Mackman, R.L.; Jacobson, K.A. Synthesis of ethyl (1*S*,2*R*,3*S*,4*S*,5*S*)-2,3-*O*-(isopropylidene)-4-hydroxy-bicyclo [3.1.0] hexane-carboxylate from L-ribose: a versatile chiral synthon for preparation of adenosine and P2 receptor ligands. *Nucleosides, Nucleotides, and Nucleic Acids*, **2008**, *27*, 279-291.

## Spectroscopic characterization of selected nucleoside derivatives.

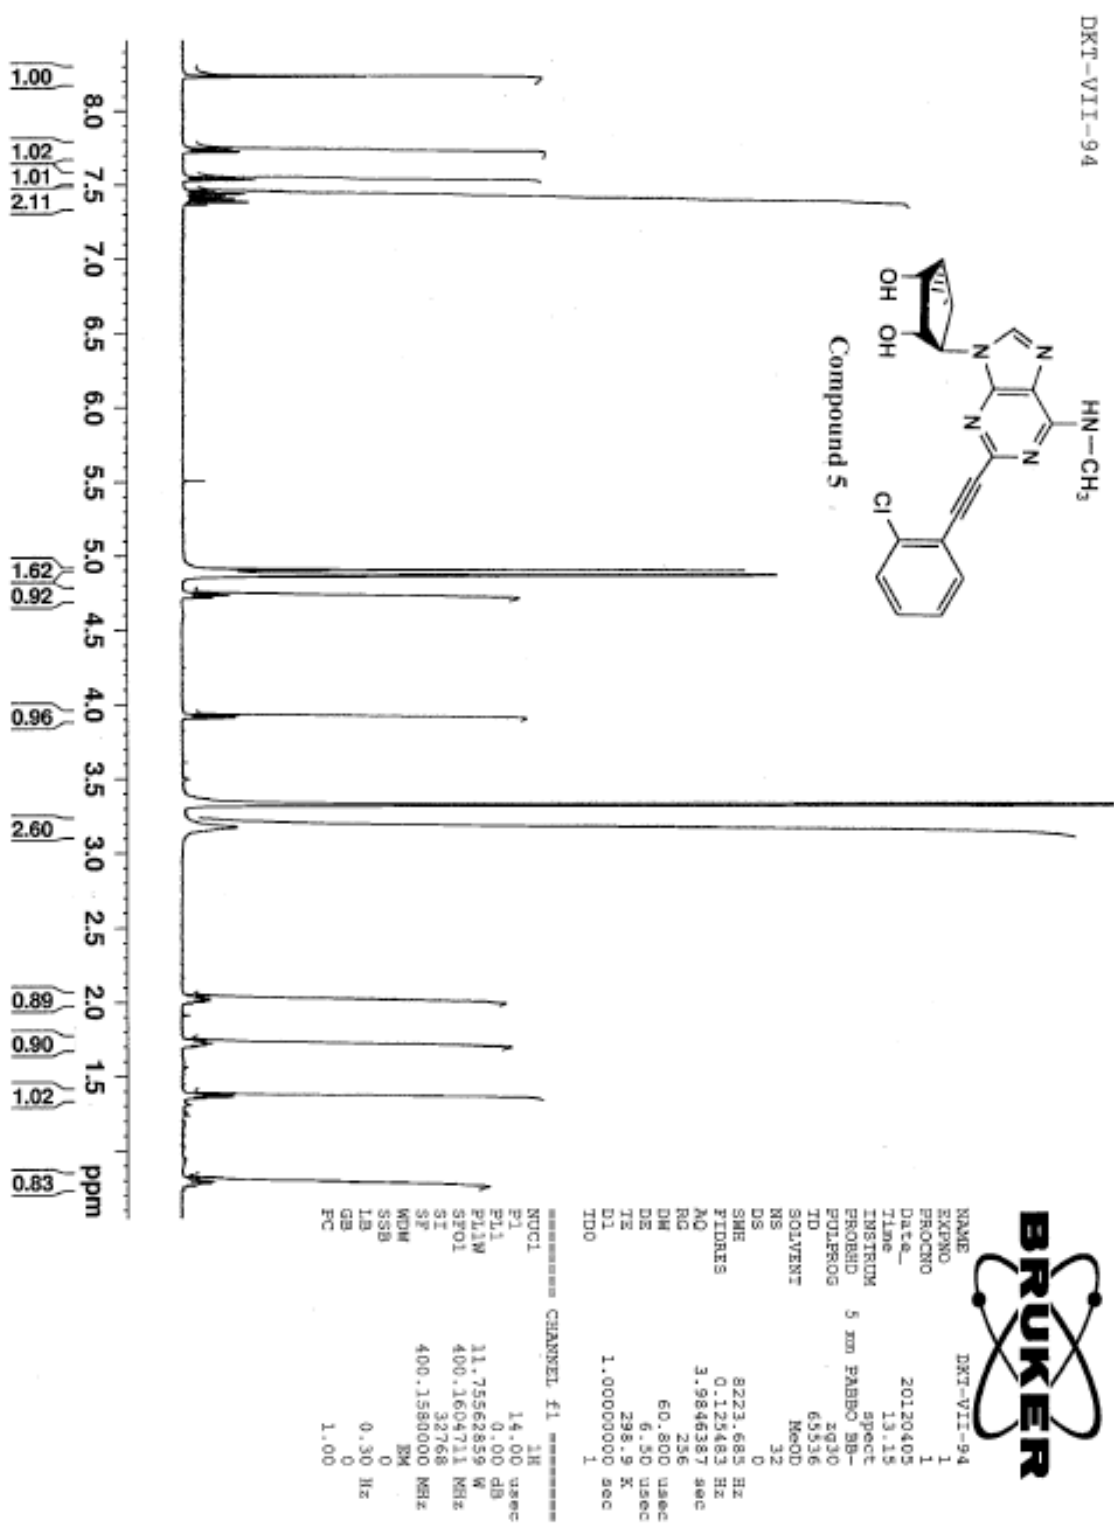

## Elemental Composition Report

Page 1

## Single Mass Analysis

Tolerance = 9.0 mDa / DBE: min = -1.5, max = 50.0

Element prediction: Off

Number of isotope peaks used for i-FIT = 3

Monoisotopic Mass, Even Electron Ions

217 formula(e) evaluated with 4 results within limits (up to 50 closest results for each mass)

Elements Used:

C: 0-500 H: 0-1000 N: 0-6 O: 0-6 35Cl: 1-1

05-Apr-2012 13:55:18

DKT-VII-94\_395 103 (1.751) Cn (Cen,7, 50.00, Ar); Sm (SG, 2x3.00); Sb (3,10.00); Cm (103,110)

TOF MS ES+

1.09e+003

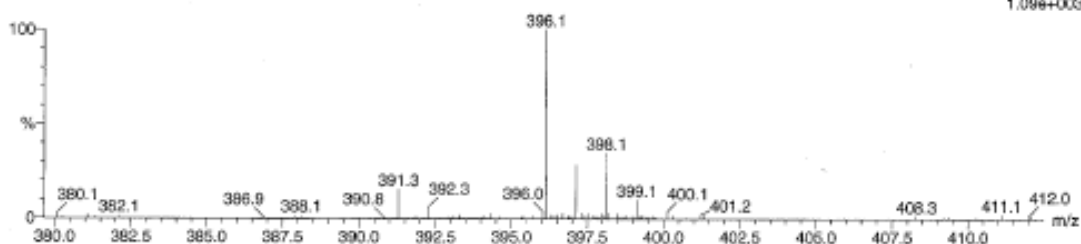

| Mass     | Calc. Mass | mDa  | PPM   | DBE  | i-FIT | Formula            |
|----------|------------|------|-------|------|-------|--------------------|
| 396.1222 | 396.1227   | -0.5 | -1.3  | 13.5 | 157.1 | C20 H19 N5 O2 35Cl |
|          | 396.1214   | 0.8  | 2.0   | 8.5  | 157.9 | C19 H23 N 06 35Cl  |
|          | 396.1268   | -4.6 | -11.6 | 17.5 | 148.8 | C25 H19 N3 35Cl    |
|          | 396.1155   | 6.7  | 16.9  | 17.5 | 145.3 | C26 H19 N 0 35Cl   |

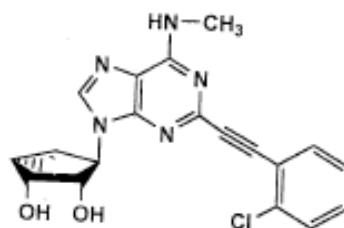

Compound 5

DKT-VII-80

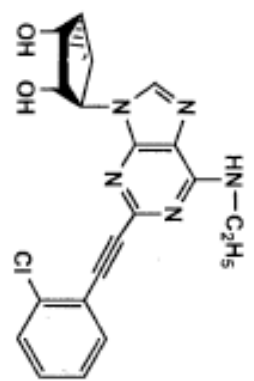

Compound 9

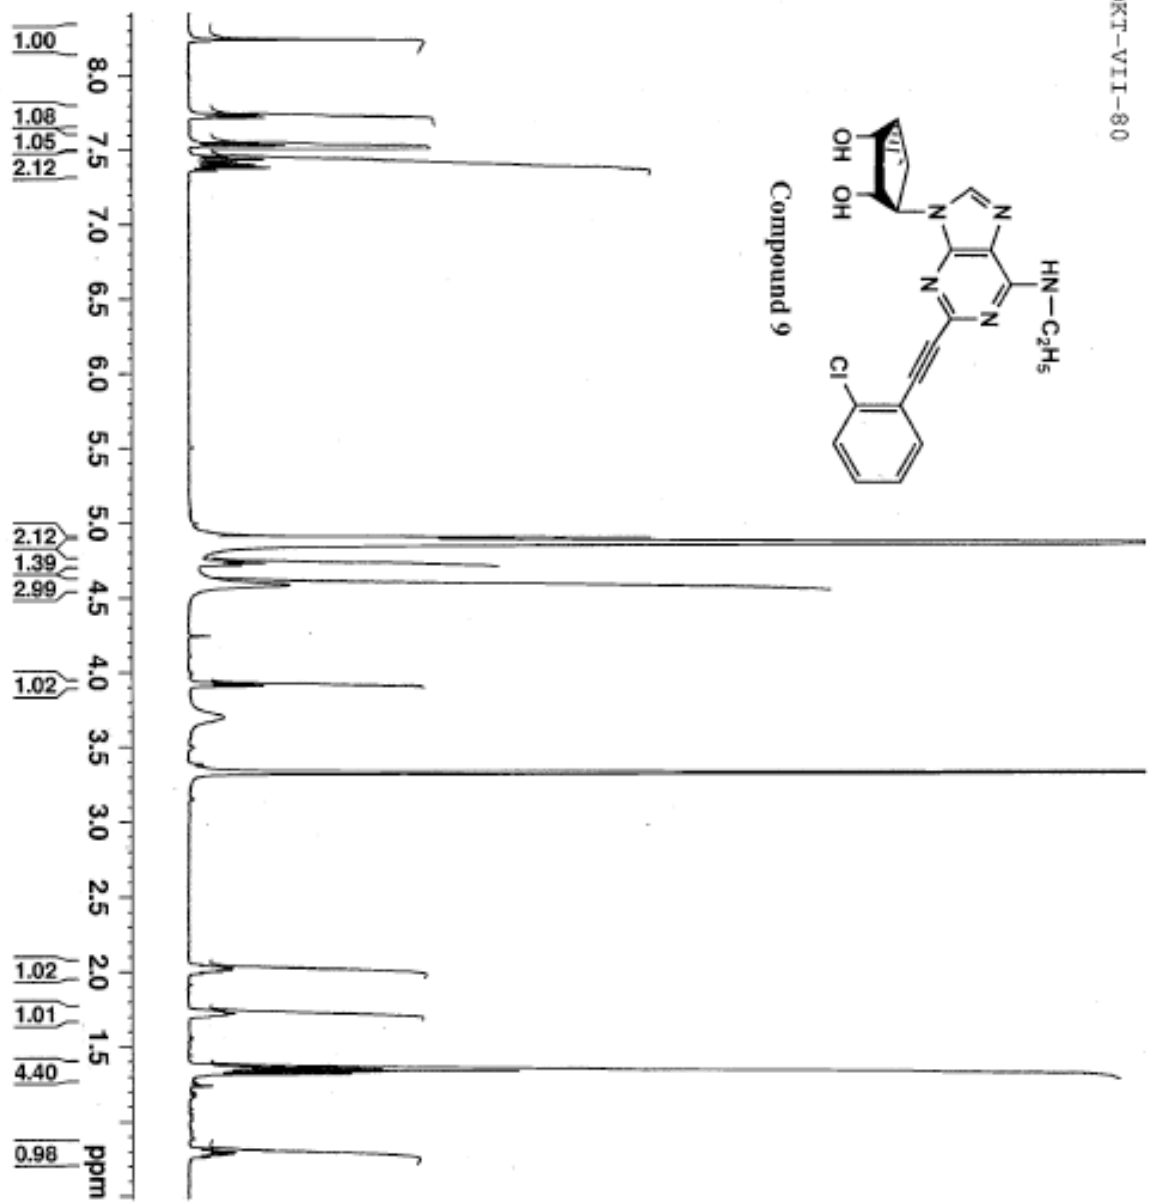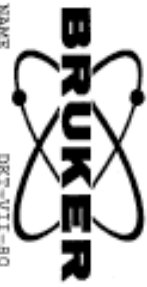

NAME DKT-VII-80  
 EXPNO 1  
 PROCNO 1  
 Date\_ 20120212  
 Time 9.51  
 INSTRUM spect  
 PROBRD 5 mm PABBO BB-  
 PULPROG zg30  
 ID 65536  
 SOLVENT MeOD  
 NS 32  
 DS 0  
 SWH 8223.685 Hz  
 FIDRES 0.125483 Hz  
 AQ 3.9846387 sec  
 RG 256  
 TDW 60.800 usec  
 DE 6.50 usec  
 TE 300.0 K  
 D1 1.00000000 sec  
 FDO 1

----- CHANNEL f1 -----  
 NUCL1 1H  
 P1 14.00 usec  
 PL1 0.00 dB  
 PL1W 11.75562659 W  
 SFO1 400.1604711 MHz  
 SI 32768  
 SF 400.1580000 MHz  
 MDM EM  
 SSB 0  
 LB 0.30 Hz  
 GB 0  
 PC 1.00

## Elemental Composition Report

Page 1

## Single Mass Analysis

Tolerance = 9.0 mDa / DBE: min = -1.5, max = 50.0

Element prediction: Off

Number of isotope peaks used for i-FIT = 3

Monoisotopic Mass, Even Electron Ions

226 formula(e) evaluated with 4 results within limits (up to 50 closest results for each mass)

Elements Used:

C: 0-500 H: 0-1000 N: 0-6 O: 0-6 35Cl: 1-1

12-Mar-2012 15:08:30  
TOF MS ES+

DKT-VII-80\_409 164 (2.790) Cn (Cen.5, 50.00, Ar); Sm (50, 2x3.00); Sb (12,10.00); Cm (164;168)

9.66e+002

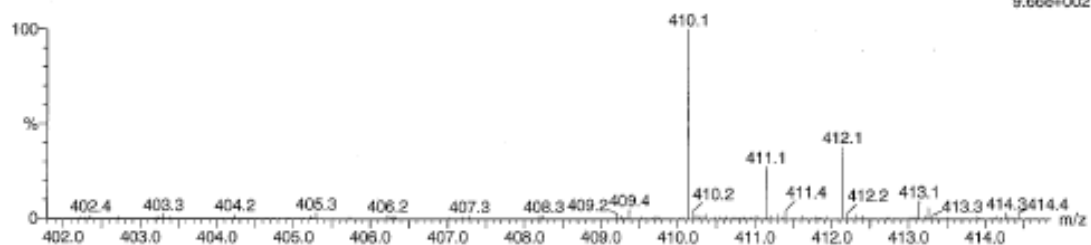

Minimum:

Maximum: 9.0 10.0 -1.5

| Mass     | Calc. Mass | mDa  | PPM   | DBE  | i-FIT | Formula            |
|----------|------------|------|-------|------|-------|--------------------|
| 410.1383 | 410.1384   | -0.1 | -0.2  | 13.5 | 150.6 | C21 H21 N5 O2 35Cl |
|          | 410.1370   | 1.3  | 3.2   | 8.5  | 150.0 | C20 H25 N O6 35Cl  |
|          | 410.1424   | -4.1 | -10.0 | 17.5 | 145.7 | C26 H21 N3 35Cl    |
|          | 410.1312   | 7.1  | 17.3  | 17.5 | 143.1 | C27 H21 N O 35Cl   |

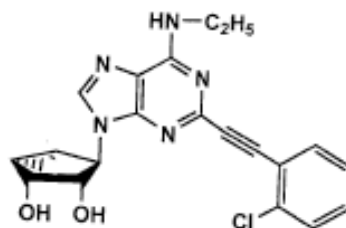

Compound 9

DKT-VII-75

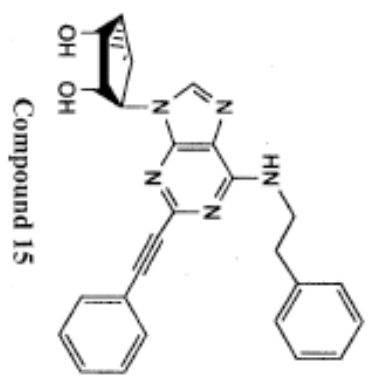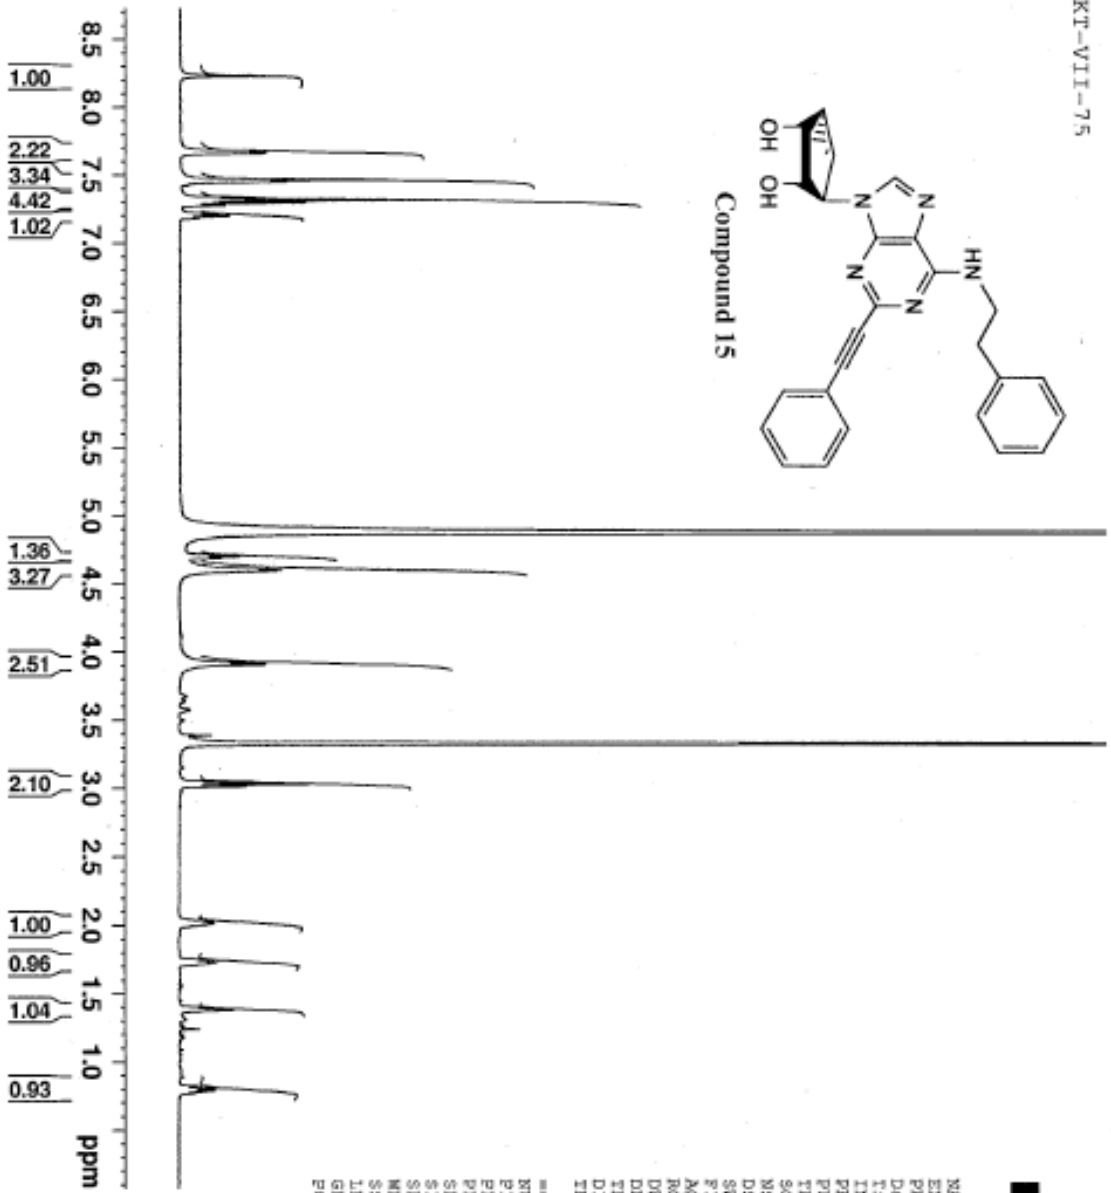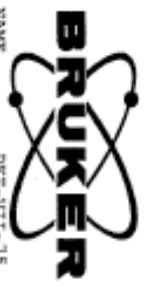

NAME DKT-VII-75  
 EXPNO 1  
 PROCNO 1  
 Date\_ 20120308  
 Time\_ 10.21  
 INSTNUM 5  
 PROBHD 5 mm PABBO BBI-  
 PULPROG zgpg30  
 TD 65536  
 SOLVENT MeOD  
 NS 32  
 DS 0  
 SWH 8223.685 Hz  
 FIDRES 0.125483 Hz  
 AQ 3.9846387 sec  
 RG 256  
 DN 60.800 usec  
 DE 6.50 usec  
 TE 298.6 K  
 D1 1.00000000 sec  
 TD0 1

\*\*\*\*\* CHANNEL f1 \*\*\*\*\*  
 NUCL 1H  
 P1 14.00 usec  
 PL1 0.00 dB  
 PL1W 11.75562859 W  
 SFO1 400.1604711 MHz  
 SF 400.1580000 MHz  
 MDW EM  
 SSB 0  
 LB 0.30 Hz  
 GB 0  
 PC 1.00

## Elemental Composition Report

Page 1

## Single Mass Analysis

Tolerance = 5.0 mDa / DBE: min = -1.5, max = 50.0

Element prediction: Off

Number of isotope peaks used for i-FIT = 3

Monoisotopic Mass, Even Electron Ions

270 formula(e) evaluated with 2 results within limits (up to 50 closest results for each mass)

Elements Used:

C: 0-500 H: 0-1000 N: 0-6 O: 0-6

08-Mar-2012 09:52:09

DKT-VII-75\_451r 33 (0.562) Cn (Cen,5, 50.00, Ar); Sm (SG, 2x3.00); Sb (12,10.00)

TOF MS ES+

1.34e+002

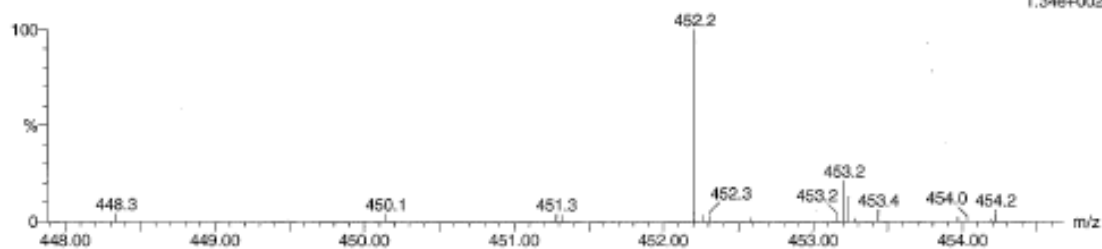

Minimum: -1.5  
Maximum: 5.0 10.0 50.0

| Mass     | Calc. Mass | mDa  | PPM  | DBE  | i-FIT | Formula       |
|----------|------------|------|------|------|-------|---------------|
| 452.2070 | 452.2073   | -0.3 | -0.7 | 12.5 | 1.9   | C26 H30 N 06  |
|          | 452.2087   | -1.7 | -3.8 | 17.5 | 2.8   | C27 H26 N5 O2 |

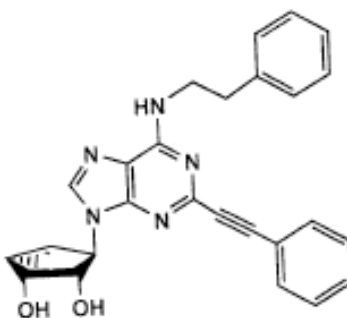

Compound 15

## Pharmacological assays

### Receptor binding and functional assays

[<sup>3</sup>H]R-*N*<sup>6</sup>-Phenylisopropyladenosine (**49**, [<sup>3</sup>H]R-PIA, 63 Ci/mmol) and [<sup>125</sup>I]*N*<sup>6</sup>-(4-Amino-3-iodobenzyl)adenosine-5'-*N*-methyluronamide (**51**, [<sup>125</sup>I]I-AB-MECA, 2200 Ci/mmol) were purchased from Perkin–Elmer Life and Analytical Science (Boston, MA). [<sup>3</sup>H](2-[p-(2-Carboxyethyl)phenyl-ethylamino]-5'-*N*-ethylcarboxamido-adenosine) (**50**, [<sup>3</sup>H]CGS21680, 39 Ci/mmol) was purchased from American Radiolabeled Chemicals, Inc. (St. Louis, MO). Other pharmacological reagents were purchased from Tocris-R&D Systems, Inc. (Minneapolis, MN). Test compounds were prepared as 5 mM stock solutions in DMSO and stored frozen.

*Cell Culture and Membrane Preparation* - CHO cells stably expressing the recombinant human (h) A<sub>1</sub> and hA<sub>3</sub>ARs, and HEK-293 cells stably expressing the hA<sub>2A</sub>AR were cultured in Dulbecco's modified Eagle medium (DMEM) and F12 (1:1) supplemented with 10% fetal bovine serum, 100 units/mL penicillin, 100 µg/mL streptomycin, and 2 µmol/mL glutamine. In addition, 800 µg/mL geneticin was added to the A<sub>2A</sub> media, while 500 µg/mL hygromycin was added to the A<sub>1</sub> and A<sub>3</sub> media. After harvesting, cells were homogenized and suspended in PBS. Cells were then centrifuged at 240 g for 5 min, and the pellet was resuspended in 50 mM Tris-HCl buffer (pH 7.5) containing 10 mM MgCl<sub>2</sub>. The suspension was homogenized and was then ultra-centrifuged at 14,330 g for 30 min at 4 °C. The resultant pellets were resuspended in Tris buffer, incubated with adenosine deaminase (3 units/mL) for 30 min at 37 °C. The suspension was homogenized with an electric homogenizer for 10 sec, pipetted into 1 mL vials and then stored at -80 °C until the binding experiments. The protein concentration was measured using the BCA Protein Assay Kit from Pierce Biotechnology, Inc. (Rockford, IL).<sup>1</sup>

*Binding assays:* Standard radioligand binding assays for hA<sub>1</sub>, A<sub>2A</sub>, and A<sub>3</sub>ARs were used.<sup>2-4</sup> Into each tube in the binding assay was added 50 µL of increasing concentrations of the test ligand in Tris-HCl buffer (50 mM, pH 7.5) containing 10 mM MgCl<sub>2</sub>, 50 µL of the appropriate agonist radioligand, and finally 100 µL of membrane suspension. For the A<sub>1</sub>AR (22 µg of protein/tube) the radioligand used was [<sup>3</sup>H]**49** (R-



PIA, final concentration of 3.5 nM). For the A<sub>2A</sub>AR (20 µg/tube) the radioligand used was [<sup>3</sup>H]**50** (CGS21680, 10 nM). For the A<sub>3</sub>AR (21 µg/tube) the radioligand used was [<sup>125</sup>I]**51** (I-AB-MECA, 0.2 nM). Nonspecific binding was determined using a final concentration of 10 µM NECA **52** diluted with the buffer. The mixtures were incubated at 25 °C for 60 min in a shaking water bath. Binding reactions were terminated by filtration through Brandel GF/B filters under a reduced pressure using a M-24 cell harvester (Brandel, Gaithersburg, MD). Filters were washed three times with 3 mL of 50 mM ice-cold Tris-HCl buffer (pH 7.5). Filters for A<sub>1</sub> and A<sub>2A</sub>AR binding were placed in scintillation vials containing 5 mL of Hydrofluor scintillation buffer and counted using a Perkin Elmer Liquid Scintillation Analyzer (Tri-Carb 2810TR). Filters for A<sub>3</sub>AR binding were counted using a Packard Cobra II γ-counter. The K<sub>i</sub> values were determined using GraphPad Prism for all assays.

*cAMP accumulation assay:* Archival hA<sub>3</sub>AR efficacy data for compounds **1 – 3**: Intracellular cAMP levels were measured with a competitive protein binding method.<sup>5</sup> CHO cells that expressed the recombinant hA<sub>3</sub>AR were harvested by trypsinization. After centrifugation and resuspended in medium, cells were planted in 24-well plates in 1.0 mL medium. After 24 h, the medium was removed and cells were washed three times with 1 mL DMEM, containing 50 mM HEPES, pH 7.4. Cells were then treated with the agonist **52** (NECA) or test compound in the presence of rolipram (10 µM) and adenosine deaminase (ADA, 3 units/mL). After 45 min forskolin (10 µM) was added to the medium, and incubation was continued for an additional 15 min. The reaction was terminated by removing the supernatant, and cells were lysed upon the addition of 200 µL of 0.1 M ice-cold HCl. The cell lysate was resuspended and stored at -20°C. For determination of cAMP production, 100 µL of the HCl solution was used in the Sigma Direct cAMP Enzyme Immunoassay following the instructions provided with the kit. The results were interpreted using a Bio-Tek Instruments ELx808 Ultra Microplate reader at 405 nm.

hA<sub>3</sub>AR efficacy data for new compounds **4 – 21**: CHO cells stably expressing the human A<sub>3</sub>AR were seeded in 96-well plates and cultured overnight at 37 °C in 5% CO<sub>2</sub>. The culture medium was replaced with stimulation buffer containing 0.1% bovine serum albumin (BSA), 3 units/mL ADA, and 10 µM rolipram, and incubated at 37 °C for 30 min. Agonists were then added and incubated for 30 min, followed by treatment with 10

$\mu\text{M}$  forskolin for another 15 min, the medium was aspirated, and cells were lysed using lysis buffer (containing 0.3% Tween-20, 5 mM HEPES and 0.1% BSA). Samples were transferred to a 384-well plate. Donor bead-conjugated anti-cAMP antibody and biotinylated cAMP/acceptor bead-conjugated streptavidin were added according to instructions from cyclic AMP Alphascreen protocol. Samples were measured using the EnVision® Multilabel Reader (PerkinElmer). When used at a single concentration of 10  $\mu\text{M}$ , the inhibition was expressed as a percent of the maximal effect of 10  $\mu\text{M}$  5'-*N*-ethylcarboxamidoadenosine (=100%).

Relative efficacy data at  $\text{hA}_{2\text{B}}\text{AR}$  for selected compounds **3c**, **3e**, **5**, **6**, **9**, **10**, **13**, and **15** at a single concentration (10  $\mu\text{M}$ ) were evaluated. Stimulation of cyclic AMP production (expressed as % of full agonist 5'-*N*-ethylcarboxamidoadenosine, 10  $\mu\text{M}$ ) was determined using the cyclic AMP Alphascreen protocol, as above, with CHO cells stably expressing the  $\text{hA}_{2\text{B}}\text{AR}$ . Similar values (% relative efficacy at  $\text{hA}_{2\text{B}}\text{AR}$ ) for other non-truncated nucleosides similar to **3** in this study, as reported by Tosh et al. (2012),<sup>7</sup> were: **15** (*N*<sup>6</sup>-methyl, C2-(3-chlorophenyl)ethynyl), 21 $\pm$ 4; **23** (*N*<sup>6</sup>-methyl, C2-(4-acetylphenyl)ethynyl), 22 $\pm$ 3; **28** (*N*<sup>6</sup>-(3-chlorobenzyl), C2-(4-fluorophenyl)ethynyl), 26 $\pm$ 1; **35** (*N*<sup>6</sup>-(3-chlorobenzyl), C2-(pyren-1-yl)ethynyl), 24 $\pm$ 3.

### Data analysis

Binding and functional parameters were calculated using Prism 5.0 software (GraphPAD, San Diego, CA, USA).  $\text{IC}_{50}$  values obtained from binding inhibition curves were converted to  $\text{K}_i$  values using the Cheng-Prusoff equation.<sup>6</sup> Data were expressed as mean  $\pm$  standard error.

1. Bradford, M. M. (1976) A rapid and sensitive method for the quantitation of microgram quantities of protein utilizing the principle of protein-dye binding. *Anal. Biochem.* **1976**, 72, 248-254.
2. Klotz, K. N., Lohse, M. J., Schwabe, U., Cristalli, G., Vittori, S., and Grifantini, M. *Naunyn Schmiedebergs Arch. Pharmacol.* **1989**, 340, 679-683.
3. Jarvis, M. F., Schutz, R., Hutchison, A. J., Do, E., Sills, M. A., Williams, M. J.

*Pharmacol. Exp. Ther.* **1989**, *251*, 888-893.

4. Olah, M. E., Gallo-Rodriguez, C., Jacobson, K. A., Stiles, G. L. *Mol. Pharmacol.* **1994**, *45*, 978-982.
5. Nordstedt, C., Fredholm, B. B. *Anal. Biochem.* **1990**, *189*, 231-234.
6. Cheng, Y. C., Prusoff, H. R. *Biochem. Pharmacol.* **1973**, *22*, 3099.
7. Tosh, D.K., Deflorian, F., Phan, K., Gao, Z.G., Wan, T.C., Gizewski, E., Auchampach, J.A., Jacobson, K.A. Structure-guided design of A<sub>3</sub> adenosine receptor-selective nucleosides: Combination of 2-arylethynyl and bicyclo[3.1.0]hexane substitutions. *J. Med. Chem.* **2012**, *55*, 4847-4860.

Molecular modeling simulations were performed to study the putative interactions between the newly synthesized truncated (N)-methanocarba nucleosides (compounds **4-21**) and the residues of the hA<sub>3</sub>AR binding site. Methodological details and procedures<sup>1-7</sup> are described below.

As previously reported also for the 5'-N-methyluronamido series,<sup>8</sup> these compounds were not able to fit inside the binding pocket of the hA<sub>3</sub>AR model based on the agonist-bound hA<sub>2A</sub>AR X-ray structure (PDB code 3QAK)<sup>2</sup> due to the presence of bulky substituents at the C2 position (no reasonable docking poses). For this reason, we performed docking studies on the previously reported homology model of the hA<sub>3</sub>AR based on a hybrid template where the extracellular part of TM2 was modeled following the structure of the opsin in the activated state (PDB code 3DQB).<sup>5</sup>

In this hybrid model, the extracellular terminal of TM2 was shifted outward by approximately 7 Å, as compared to the hA<sub>3</sub>AR model based exclusively on the A<sub>2A</sub>AR crystal structure, with the creation of a larger pocket for the accessibility of C2 substituents of the present (N)-methanocarba nucleosides. This TM2 shift, observed in other agonist-bound or activated GPCRs, is supposed to be specific for adenosine ligands containing a rigid C2 extension, and it can occur in the hA<sub>3</sub>AR thanks to the absence of structural constraints in that region. On the contrary, at the A<sub>2A</sub>AR the presence of two disulfide bridges between EL1 and EL2, in addition to the disulfide bond involving TM3 and EL2 and highly conserved among family A GPCRs, forces the extracellular terminal of TM2 toward the TM bundle. Therefore, the inability of the A<sub>2A</sub>AR to undergo this rearrangement might contribute to the A<sub>3</sub>AR selectivity of these compounds.

Figure 1 shows the hypothetical binding mode of compound **10** inside the hA<sub>3</sub>AR hybrid model binding pocket. Most of the key interactions previously observed for the 5'-N-methyluronamido series at this receptor were also noted for the docking pose of this compound.<sup>8</sup>

In particular, the 3'- and 2'-hydroxyl groups formed H-bonds with Ser271 (7.42) and His272 (7.43) side chains, respectively. The side chain of Asn250 (6.55) strongly interacted with compound **10** through two H-bonds involving the 6-amino group and the N<sup>7</sup> atom of the adenine ring. Moreover, the adenine ring was anchored inside the binding site by a  $\pi$ - $\pi$  stacking interaction with Phe168 (EL2) and strong hydrophobic contacts with Leu246 (6.51) and Ile268 (7.39).

In the binding pose of compound **10**, the substituents at the N<sup>6</sup> and C2 positions were located in the extracellular portion of the hA<sub>3</sub>AR binding pocket. In particular, the N<sup>6</sup>-3-chlorobenzyl ring was accommodated in a hydrophobic pocket among TM5, TM6, and EL2 delimited by Val169 (EL2), Met174(5.35) and Ile253 (6.58), forming strong hydrophobic interactions with these residues.

On the other hand, the arylethynyl substituent at the C2 position of **10** was oriented toward TM2 and EL1 and was anchored by favorable hydrophobic interactions with residues of the upper part of the binding site, namely, Tyr15(1.35), Val72 (2.64), Tyr265 (7.36), Ile268 (7.39), and the carbon chain of Gln167 (EL2).

Compared to the docking pose of the 5'-N-methyluronamido series,<sup>8</sup> the only difference observed in the binding mode of this new series was the lack of interaction with Thr94 (3.36) due to the 4'-truncation of the new (N)-methanocarba nucleosides. In fact, while the 5'-N-methyluronamides were able to form a H-bond with the side chain hydroxyl group of Thr94 (3.36), the absence of a substituent at the 4'-position prevented

this new series of compounds from interacting with this key residue. This missing interaction was considered the reason for the low efficacy profile of these 4'-truncated nucleosides. In fact, even though no mutagenesis data are available for position 3.36 at the hA<sub>3</sub> subtype, previous mutagenesis studies have shown the importance of this threonine residue in agonist but not antagonist binding at the hA<sub>1</sub> and hA<sub>2A</sub> subtypes.<sup>9,10</sup> Therefore, interaction of ligands with Thr 3.36, conserved among all ARs, might be crucial to lock the ribose/methanocarba moiety in an optimal conformation to strongly interact with residues at positions 7.42 and 7.43 in order to pull TM7 towards TM3 to efficiently activate the receptor.

Overall, these molecular modeling results showed that the binding of the newly synthesized (N)-methanocarba nucleosides is allowed by the plasticity of the receptor structure and by its ligand-specific reorganization that creates a very large hydrophobic pocket, dependent on an outward displacement of TM2, able to accommodate bulky and rigid groups at the C2 position. Moreover, the lack of a key H-bond with Thr94 (3.36) and the consequent poor stabilization of the methanocarba ring seemed to be the reason for the low efficacy profile of these derivatives. However, these ligands were able to form strong interactions with many residue already hypothesized to be involved in the binding of other hA<sub>3</sub>AR antagonists,<sup>11</sup> such as Asn250 (6.55), Phe168 (EL2), Leu246 (6.51) and Val169 (EL2). These findings are consistent with the pharmacological results showing for these (N)-methanocarba nucleosides good affinity but low efficacy at the hA<sub>3</sub>AR.

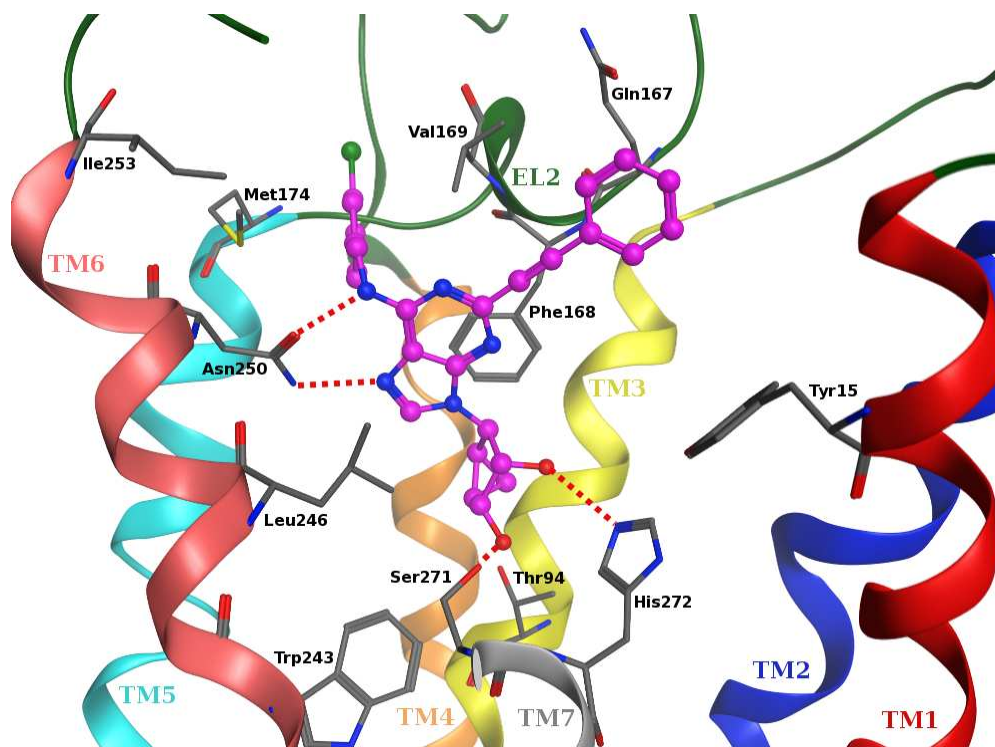

**Figure 1:** Docking pose of compound 10 (in magenta) inside the binding site of the hA<sub>3</sub>AR hybrid model. Side chains of some amino acids important for ligand recognition and H-bonding interactions are highlighted. Hydrogen atoms are not displayed. Part of TM7 is omitted.

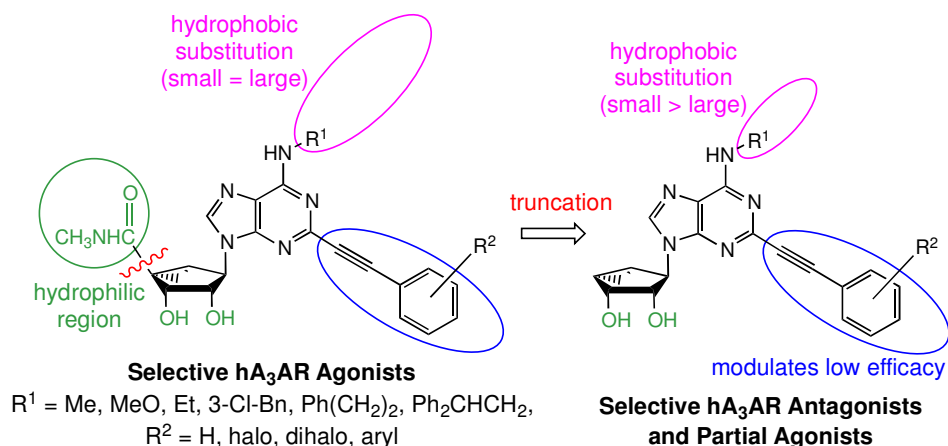

**Figure 2:** General requirements of high affinity binding to the hA<sub>3</sub>AR, comparing 5'-N-methyluronamido series (on the left) and 4'-truncated series (on the right). In the truncated series, smaller *N*<sup>6</sup> substituents, such as methyl and ethyl, provided higher A<sub>3</sub>AR affinity than *N*<sup>6</sup>-arylalkyl substituents.

## Experimental section

### Molecular modeling

#### hA<sub>3</sub>AR homology models:

Previously reported molecular models of the hA<sub>3</sub>AR, built using the alignment and the homology modeling tools implemented in the MOE suite,<sup>1</sup> were used in this study. In particular, two different models were taken into account. A first model was built using as template the crystal structure of the A<sub>2A</sub>AR co-crystallized with the agonist UK-342097 (PDB ID: 3QAK)<sup>2</sup>, as described by Tosh et al.<sup>3</sup>

The second hA<sub>3</sub>AR model was based on a hybrid template structure as previously published.<sup>4</sup> To build this model, the agonist-bound A<sub>2A</sub>AR crystal structure was used as template for the entire A<sub>3</sub>AR structure except for the extracellular terminus of TM2 (residues from Val63 to Ser73 of A<sub>3</sub>AR) and EL1 (residues from Leu74 to Tyr81 of A<sub>3</sub>AR). The X-ray structure of the opsin in its active conformation (PDB ID: 3DQB)<sup>5</sup> was used as template to build the extracellular terminus of TM2. During the homology modeling of this hybrid model of A<sub>3</sub>AR, no structural template was used for the modeling of EL1.

#### Molecular docking of truncated (N)-methanocarba derivatives at the hA<sub>3</sub>AR models:

Compounds structures were built using the builder tool implemented in the MOE suite<sup>1</sup> and subjected to energy minimization using the MMFF94x force field, until a RMS gradient of 0.05.

Molecular docking of the ligands at the hA<sub>3</sub>AR models was performed by means of the Glide<sup>6</sup> package part of the Schrödinger suite.<sup>7</sup>

The docking site was defined with key residues in the binding pocket of the A<sub>3</sub>AR model, namely Phe168, Asn250, Trp243 and His272, and a 26 Å x 26 Å x 26 Å box was centered on those residues. Docking of the ligands was performed in the rigid binding site

with Glide 5.0 using the XP (extra precision) procedure. The top scoring docking conformations were subjected to the receptor sampling by means of the Refinement module in Prime 2.0. The Prime side-chain sampling was performed on all the residues within a 6Å of the ligand. The refined model for each ligand was chosen as final binding conformation.

### References:

1. Molecular Operating Environment (MOE), version 2010.10, Chemical Computing Group Inc., 1255 University St., Suite 1600, Montreal, QC, H3B 3X3 (Canada)
2. Xu, F., Wu, H., Katritch, V., Han, G.W., Jacobson, K.A., Gao, Z.G., Cherezov, V., Stevens, R. Agonist bound structure of the human adenosine A<sub>2A</sub> receptor. *Science* **2011**, 332, 322-327.
3. Tosh, D.K., Phan, K., Deflorian, F., Wei, Q., Yoo, L.S., Gao, Z.G., Jacobson, K.A. Click Modification in the N<sup>6</sup> Region of A<sub>3</sub> Adenosine Receptor-Selective Carbocyclic Nucleosides for Dendrimeric Tethering that Preserves Pharmacophore Recognition. *Bioconjug. Chem.* **2012**, 23, 232-247.
4. Tosh, D.K., Deflorian, F., Phan, K.; Gao, Z.G.; Wan, T.C.; Gizewski, E.; Auchampach, J.A.; Jacobson, K.A. Structure-Guided Design of A<sub>3</sub> Adenosine Receptor-Selective Nucleosides: Combination of 2-Arylethynyl and Bicyclo[3.1.0]hexane Substitutions. *J. Med. Chem.* **2012**, 55, 4847-4860.
5. Scheerer, P., Park, J.H., Hildebrand, P.W., Kim, Y.J., Krauss, N., Choe, H.- W., Hofmann, K.P., Ernst, O.P. Crystal structure of opsin in its G-protein-interacting conformation. *Nature* **2008**, 455, 497-502.
6. Friesner, R. A.; Banks, J. L.; Murphy, R. B.; Halgren, T. A.; Klicic, J. J.; Mainz, D. T.; Repasky, M. P.; Knoll, E. H.; Shaw, D. E.; Shelley, M.; Perry, J. K.; Francis, P.; Shenkin, P. S., Glide: A New Approach for Rapid, Accurate Docking and Scoring. 1. Method and Assessment of Docking Accuracy. *J. Med. Chem.* **2004**, 47, 1739-1749.
7. Schrödinger, LLC, Portland, OR.
8. Tosh, D.K., Deflorian, F., Phan, K., Gao, Z.G., Wan, T.C., Gizewski, E., Auchampach, J.A., Jacobson, K.A. Structure-guided design of A<sub>3</sub> adenosine receptor-selective nucleosides: Combination of 2-arylethynyl and bicyclo[3.1.0]hexane substitutions. *J. Med. Chem.* **2012**, 55, 4847-4860.
9. Kim, S.K.; Gao, Z.G.; Van Rompaey, P.; Gross, A.S.; Chen, A.; Van Calenbergh, S.; Jacobson, K.A. Modeling the adenosine receptors: comparison of the binding domains of A<sub>2A</sub> agonists and antagonists. *J. Med. Chem.* **2003**, 46, 4847-4859.
10. Rivkees, S.A.; Barbhuiya, H.; IJzerman, A.P. Identification of the adenine binding site of the human A<sub>1</sub> adenosine receptor. *J. Biol. Chem.* **1999**, 274, 3617-3621.
11. Paoletta, S.; Federico, S.; Spalluto, G.; Moro, S. Receptor-driven identification of novel human A<sub>3</sub> adenosine receptor antagonists as potential therapeutic agents. *Methods Enzymol.* **2010**, 485, 225-244.
